# Supplementary material for: Eugenol-based benzoxazine: from straight synthesis to taming of the network properties
Source: Royal Society of Chemistry journal article supplement (doi:10.1039/c4ta06636g), 2015-01-01
Supplement: c4ta06636g1.pdf [file c4ta06636g1.pdf]

## Supporting Information

### Eugenol-based benzoxazine: from straight synthesis to taming of the network properties

Ludovic Dumas,<sup>a,b</sup> Leïla Bonnaud,<sup>a</sup> Marjorie Olivier,<sup>b</sup> Marc Poorteman,<sup>b</sup> and Philippe Dubois<sup>\*a</sup>

<sup>a</sup> Laboratory of Polymeric and Composite Materials, Center of Innovation and Research in Materials and Polymers (CIRMAP), Materia Nova Research Center & University of Mons, 23 Place du Parc, B-7000, Mons, Belgium.

<sup>b</sup> Department of Materials Science, Materials Engineering Research Center (CRIM), University of Mons, 23 Place du Parc, B-7000, Mons, Belgium.

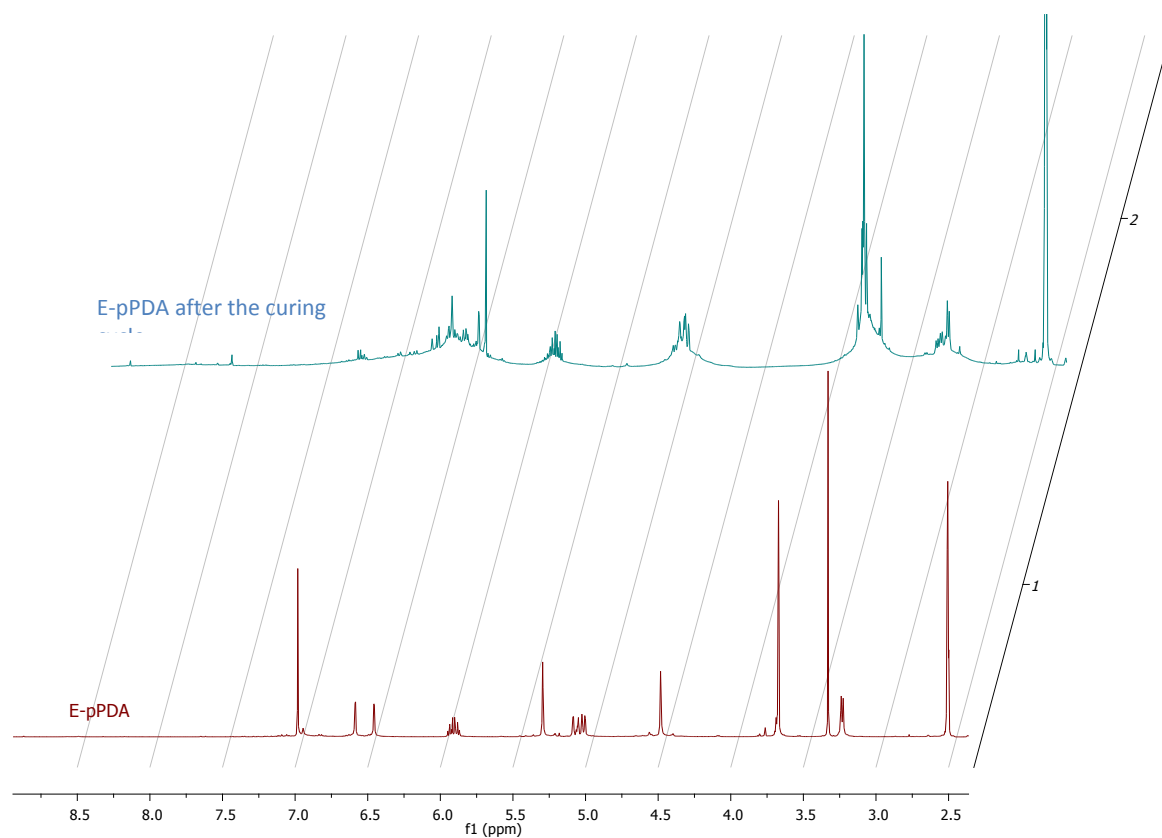

**Fig. S1.** <sup>1</sup>H NMR spectra of the E-pPDA monomer and E-pPDA after the curing cycle. DMSO-d<sub>6</sub>
